# Supplementary material
Source: Springer Nature journal article supplement (https://www.springermedizin.de/resource/supplementary/12936_2008_693_MOESM11_ESM.pdf/9548014)

**Abidjan, Cote d'Ivoire**

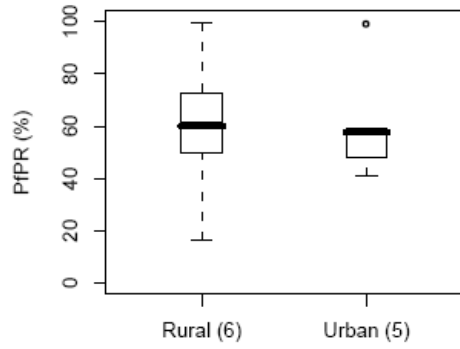

**Accra, Ghana\*\***

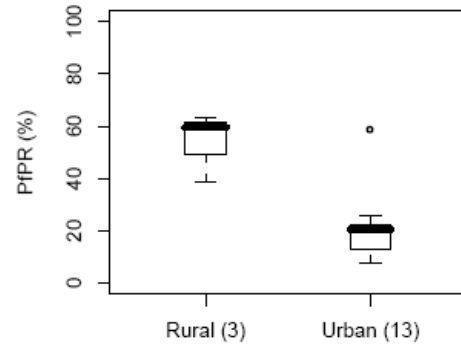

**Antananarivo, Madagascar**

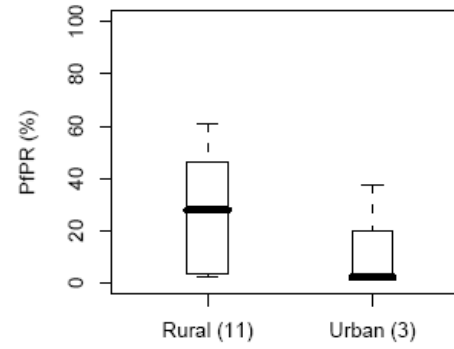

**Dar Es Salaam, Tanzania\*\***

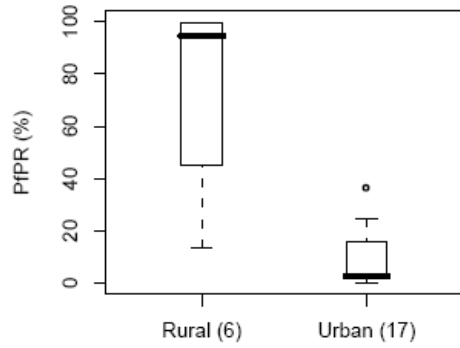

**Kampala, Uganda\*\***

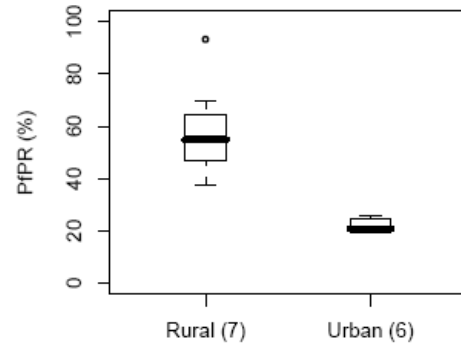

**Kinshasa/Brazzaville, DRC/Congo\***

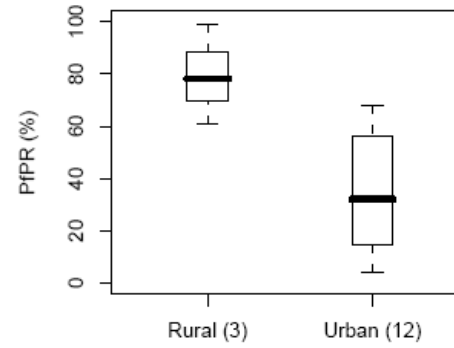

**Lagos, Nigeria\***

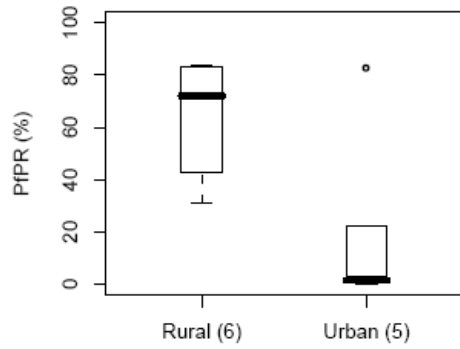

**Maputo, Mozambique**

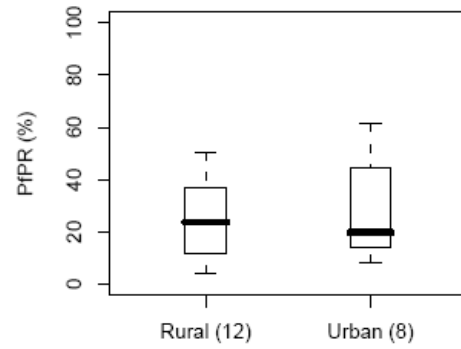

**Yaounde, Cameroon**

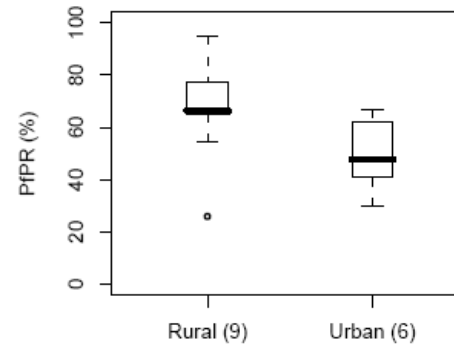

Supplement: MOESM11 [file 9548014]
